# Supplementary material for: Casein kinase 2 activity is a host restriction factor for AAV transduction
Source: PubMed Central journal article supplement — Mol Ther. 2023 Nov 11;32(1):84–102. doi: 10.1016/j.ymthe.2023.11.010 (PMC10787142; doi:10.1016/j.ymthe.2023.11.010), 2023-11-11
Supplement: mmc1.pdf [file mmc1.pdf]

**YMTHE, Volume 32**

## **Supplemental Information**

### **Casein kinase 2 activity is a host restriction factor for AAV transduction**

**Izabela Kraszewska, Katarzyna Sarad, Kalina Andrysiak, Aleksandra Kopacz, Luisa Schmidt, Marcus Krüger, Józef Dulak, and Agnieszka Jaźwa-Kusior**

Table S1. Antibodies used in immunofluorescent staining

| <b>target</b>                         | <b>clone</b>            | <b>host</b> | <b>supplier</b>         |
|---------------------------------------|-------------------------|-------------|-------------------------|
| <b>AAV8/9 intact capsid</b>           | ADK8/9                  | mouse       | Progen                  |
| <b>ATM</b>                            | 2C1                     | mouse       | ThermoFisher Scientific |
| <b>ATM/ATR phospho-substrate</b>      | 2851S                   | rabbit      | Cell Signaling          |
| <b><math>\alpha</math>-SMA</b>        | Polyclonal<br>(ab5694)  | rabbit      | Abcam                   |
| <b>BIP</b>                            | polyclonal              | rabbit      | Proteintech             |
| <b>CANX</b>                           | polyclonal              | rabbit      | Proteintech             |
| <b>CTNNT</b>                          | 13-11                   | mouse       | ThermoFisher Scientific |
| <b>CAV1</b>                           | polyclonal              | rabbit      | Proteintech             |
| <b>CK2 (A1)</b>                       | polyclonal              | rabbit      | Proteintech             |
| <b>COL1A1</b>                         | Polyclonal<br>(ab34710) | rabbit      | Abcam                   |
| <b>DDR2</b>                           | AF2538                  | goat        | R&D                     |
| <b>MRE11</b>                          | 12D7                    | mouse       | Abcam                   |
| <b>NBS1</b>                           | D6J5I                   | rabbit      | Cell Signaling          |
| <b>p53</b>                            | 1C12                    | mouse       | Cell Signaling          |
| <b>pATM (S1981)</b>                   | polyclonal              | rabbit      | R&D systems             |
| <b>TCF21</b>                          | polyclonal<br>ab32981   | rabbit      | Abcam                   |
| <b>PIH1D1</b>                         | polyclonal              | rabbit      | Proteintech             |
| <b>anti-mouse IgG AlexaFluor-488</b>  | polyclonal              | donkey      | ThermoFisher Scientific |
| <b>anti-mouse IgG AlexaFluor-568</b>  | polyclonal              | donkey      | ThermoFisher Scientific |
| <b>anti-mouse IgG AlexaFluor-647</b>  | polyclonal              | donkey      | ThermoFisher Scientific |
| <b>anti-rabbit IgG AlexaFluor-488</b> | polyclonal              | donkey      | ThermoFisher Scientific |
| <b>anti-rabbit IgG AlexaFluor-568</b> | polyclonal              | donkey      | ThermoFisher Scientific |
| <b>anti-rabbit IgG AlexaFluor-594</b> | polyclonal              | goat        | ThermoFisher Scientific |
| <b>anti-goat IgG AlexaFluor-488</b>   | polyclonal              | donkey      | ThermoFisher Scientific |

Table S2. List of compounds used for AAV transduction modulation with concentrations used for iPSC-CMs and iPSC-CFs in the study. When applicable, concentrations used for iPSC-CFs correspond to those for HAECs.

| <b>compound</b>      | <b>target</b> | <b>concentration<br/>for iPSC-CMs</b> | <b>concentration<br/>for iPSC-CFs</b> | <b>supplier</b> |
|----------------------|---------------|---------------------------------------|---------------------------------------|-----------------|
| <b>KU-55933</b>      | ATM           | 50 $\mu$ M                            | 20 $\mu$ M                            | MedChemExpress  |
| <b>Selisistat</b>    | SIRT1         | 50 $\mu$ M                            | 20 $\mu$ M                            | MedChemExpress  |
| <b>Silmitasertib</b> | CK2           | 100 $\mu$ M                           | 20 $\mu$ M                            | MedChemExpress  |
| <b>SR-3029</b>       | CK1           | 250 nM                                | 250 nM                                | MedChemExpress  |
| <b>HA15</b>          | BIP           | 20 $\mu$ M                            | 20 $\mu$ M                            | MedChemExpress  |

Table S3. List of primers with annealing temperatures specified for each pair

| <b>Target</b> | <b>Primers (5'--&gt; 3'); forward and reverse</b>              | <b>Ta [°C]</b> |
|---------------|----------------------------------------------------------------|----------------|
| <i>ATF4</i>   | 5'-TGCCCTGTTCCCGATTCTCT-3'<br>5'-AGGGCATCCAAGTCGAACTC-3'       | 60             |
| <i>ATM</i>    | 5'-GGTTAGCAGAAACGTGCTTAGA-3'<br>5'-CTTCATTCCGTCTCTCTTCATCAT-3' | 60             |
| <i>CAVI</i>   | 5'-TACGTAGACTCGGAGGGACA-3'<br>5'-CGGTGTGGACGTAGATGGAA-3'       | 60             |
| <i>BIP</i>    | 5'-TGGAGGTGGGCAAACAAAGA-3'<br>5'-AGACACATCGAAGGTTCCGC-3'       | 60             |
| <i>CHOP</i>   | 5'-CCAGCCACTCCCCATTATCC-3'<br>5'-GCAGGGTCAAGAGTGGTGAA-3'       | 60             |
| <i>EEF2</i>   | 5'-CGAGATCAAGGACAGTGTGG-3'<br>5'-AAGGTAGATGGGCTCCATGA-3'       | 60             |
| <i>GADD34</i> | 5'-TTATGCAAGACGCTGCACGA-3'<br>5'-AGGAAGAAAGGGTGGGCATC-3'       | 60             |
| <i>MATR3</i>  | 5'-AGTAGGGCATCCTTCACCCA-3'<br>5'-CGTGCAGTACCCTGGTTCAT-3'       | 60             |
| <i>THRAP3</i> | 5'-GCGGGTGTTCCTTTGGGGTA-3'<br>5'-GACCTTCTCTTTGGGGACCG-3'       | 60             |
| <i>NCOA5</i>  | 5'-AGAGACGCTTTGATGCCGAA-3'<br>5'-AATCGGGCCAGGCAGAGAGT-3'       | 60             |
| <i>TBP</i>    | 5'-TATAATCCCAAGCGTTTGC-3'<br>5'-GCTGGAAAACCCAACCTTCTG-3'       | 60             |

Table S4. Antibodies used for western blotting/ co-IP

| <b>Antibody (host)</b>                     | <b>supplier</b> | <b>dilution</b> | <b>blocking buffer</b>  |
|--------------------------------------------|-----------------|-----------------|-------------------------|
| <b>CAV1 (rabbit)</b>                       | Proteintech     | 1: 1000         | 5% milk in TBS          |
| <b>CK2 (A1)</b>                            | Proteintech     | 1:1000          | 5% milk in TBS          |
| <b><math>\alpha</math>-tubulin (mouse)</b> | SigmaAldrich    | 1: 1000         | 5% milk in TBS          |
| <b>eIF2<math>\alpha</math> (rabbit)</b>    | Cell Signaling  | 1:1000          | 5% milk in TBS          |
| <b>p-eIF2<math>\alpha</math> (rabbit)</b>  | Cell Signaling  | 1:1000          | 5% BSA in TBS           |
| <b>ATM/ATR phospho-substrate (rabbit)</b>  | Cell Signaling  | 1: 1000         | 5% BSA in TBS           |
| <b>AAV VP1/VP2/VP3 (rabbit)</b>            | Progen          | 1:500           | 5% milk in TBS          |
| <b>PIH1D1</b>                              | Proteintech     | 1:1000          | 5% milk in TBS          |
| <b>Mre11</b>                               | Abcam           | 1:500           | 5% milk in TBS          |
| <b>Goat anti-mouse IgG</b>                 | BD              | 1: 10 000       | As for primary antibody |
| <b>Goat anti-rabbit IgG</b>                | Cell Signaling  | 1: 10 000       | As for primary antibody |

Table S5. Putative phosphorylation motifs in AAV9 VP1 protein based on NetPhos3.1 database search.

| <b>Residue</b> | <b>Context</b> | <b>Score</b> | <b>Kinase</b> |
|----------------|----------------|--------------|---------------|
| 138 T          | EAAKTAPGK      | 0.648        | PKC           |
| 149 S          | PVEQSPQEP      | 0.600        | cdk5          |
| 181 S          | GDTESVPDP      | 0.613        | PKC           |
| 242 T          | RVITTSTRT      | 0.682        | PKC           |
| 244 T          | ITTSTRTWA      | 0.611        | PKC           |
| 251 T          | WALPTYNNH      | 0.699        | PKC           |
| 386 S          | LNDGSQAVG      | 0.653        | DNAPK         |
| 386 S          | LNDGSQAVG      | 0.601        | ATM           |
| 392 S          | AVGRSSFYC      | 0.601        | PKA           |
| 393 S          | VGRSSFYCL      | 0.628        | PKA           |
| 429 S          | SYAHSQSLD      | 0.629        | DNAPK         |
| 460 T          | QNQQTLKFS      | 0.659        | PKC           |
| 483 S          | IPGPSYRQQ      | 0.621        | PKC           |
| 490 S          | QQRVSTTVT      | 0.702        | PKC           |
| 492 T          | RVSTTVTQN      | 0.721        | PKC           |
| 508 S          | PGASSWALN      | 0.648        | PKC           |
| 516 S          | NGRNSLMNP      | 0.728        | PKA           |
| 548 T          | GKQGTGRDN      | 0.758        | PKC           |
| 561 T          | KVMITNEEE      | 0.680        | CKII          |

Fig. S1

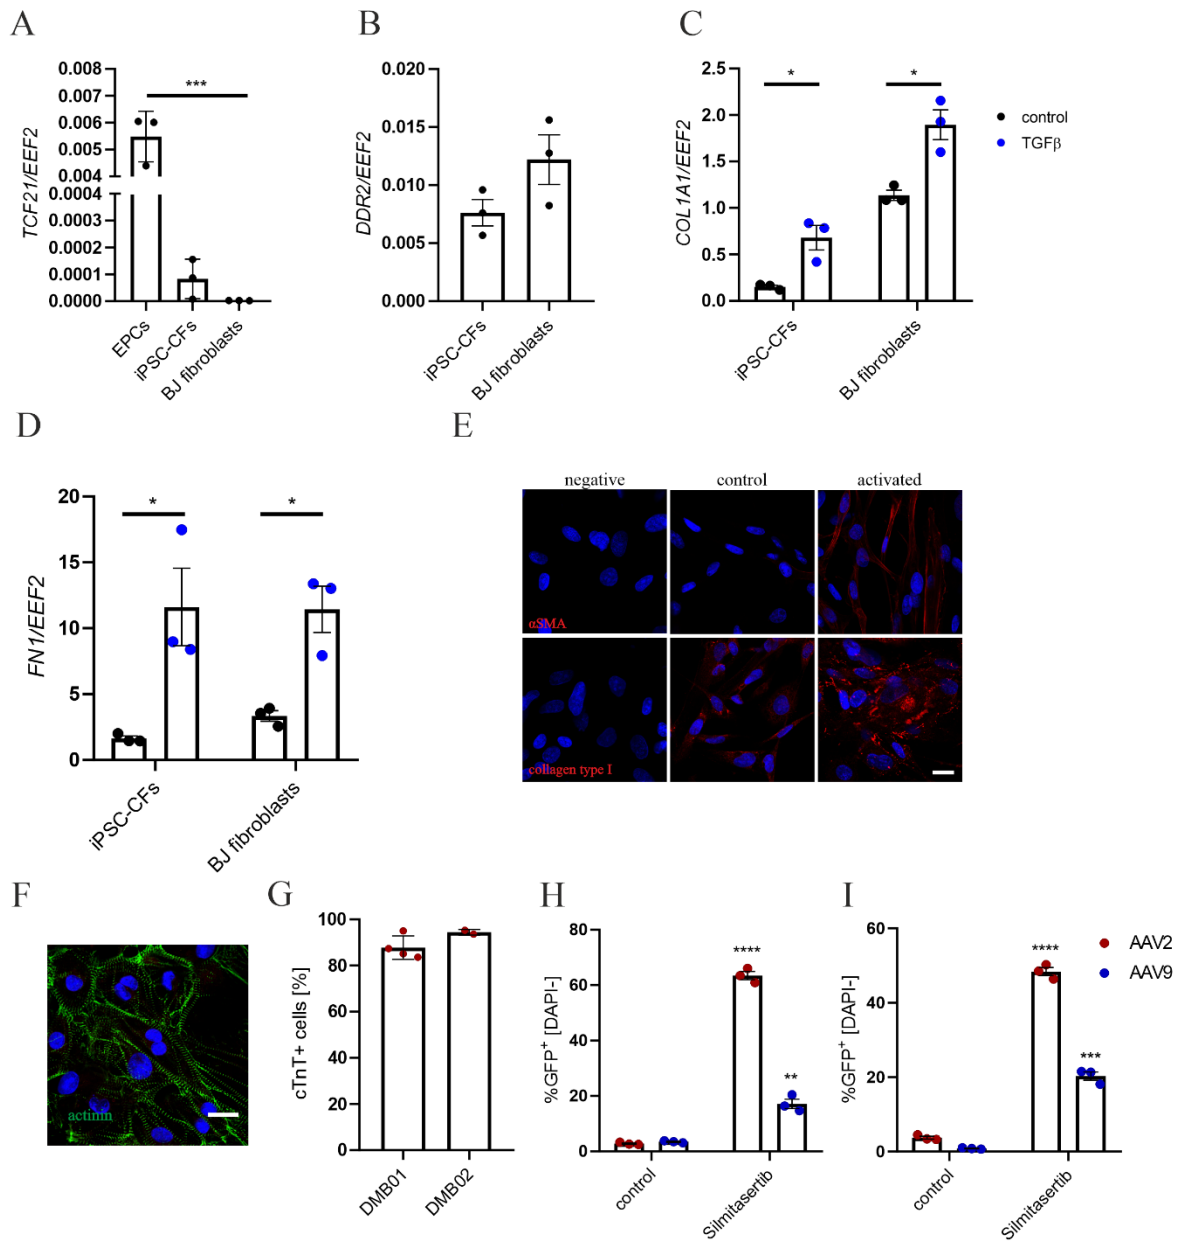

**Fig. S1 Phenotyping of iPSC-CFs and iPSC-CMs used in the study.** A – comparison of expression of TCF21 in epicardial progenitor cells, iPSC-CFs and BJ fibroblasts; B – expression of DDR2 in iPSC-CFs and BJ fibroblasts; expression of COL1A1 (C) and FN1 (D) in quiescent and activated iPSC-CFs and BJs. Cells were activated using 5 ng/ml human recombinant TGF $\beta$  for 24h; Student's t-test vs appropriate control \* p<0.05, \*\* p< 0.01, \*\*\* p<0.001; E – immunofluorescent staining of iPSC-CFs for collagen type I and  $\alpha$ -SMA in control and activated (3 consecutive days of TGF $\beta$  stimulation) cells, scale bar = 10 $\mu$ m, F – immunofluorescent staining of iPSC-CMs for  $\alpha$ -actinin, scale bar = 10 $\mu$ m; G – differentiation efficiency of DMB01 and DMB02 lines into iPSC-CMs based on percentage of cells positive for cardiac Troponin T assessed through flow cytometry; Transduction efficiency of scAAV2 and scAAV9 in primary human cardiac fibroblasts (H) and primary human fibroblasts from adventitia. Percentage of GFP+ cells was assessed by flow cytometry 5 days after exposure to the vectors. Two-way ANOVA vs control \* p<0.05, \*\* p<0.01, \*\*\* p<0.001, \*\*\*\* p<0.0001



Fig. S2

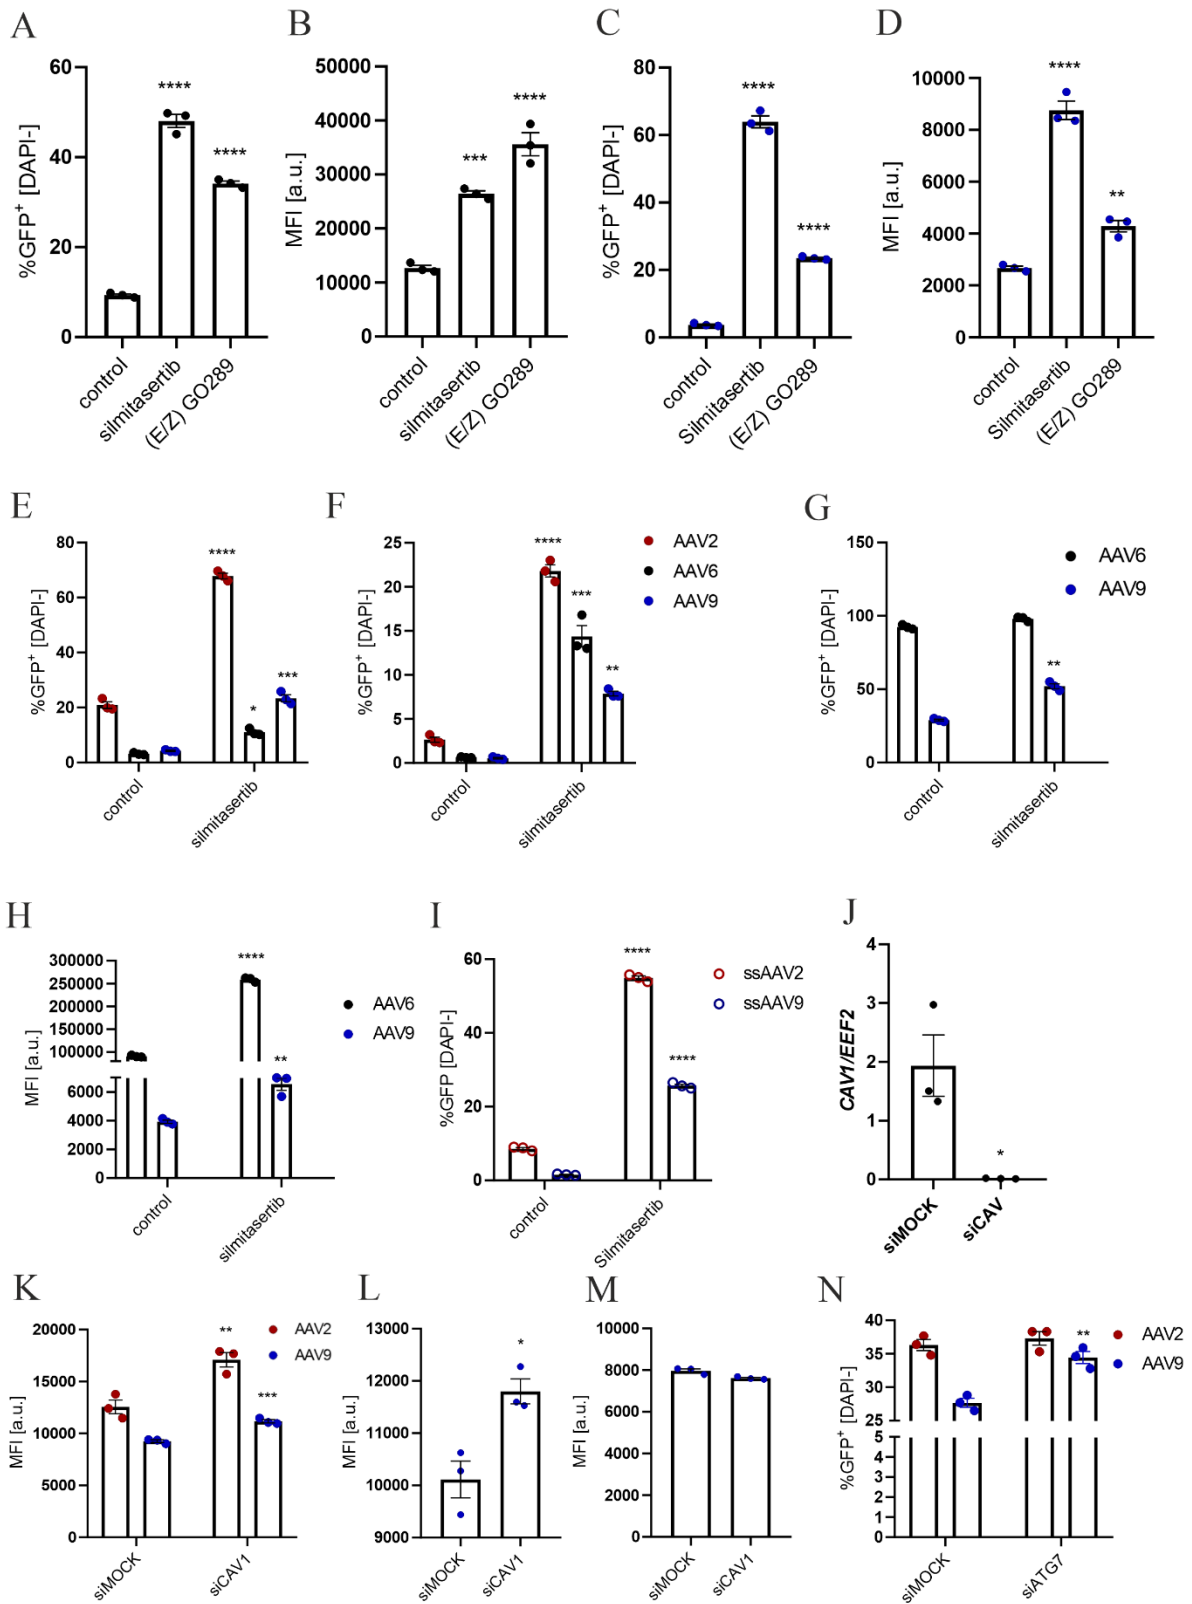

**Fig. S2 CK2 inhibition improves AAV transduction efficiency.** Transduction efficiency calculated as percentage of GFP<sup>+</sup> cells and median fluorescence intensity in iPSC-CFs (A, B) and HAECs (C, D) exposed to scAAV9-CMV-GFP vectors in control conditions or in the presence of CK2 inhibitors (silmitasertib or E/Z-GO289); One-way ANOVA vs control; Transduction efficiency in iPSC-CFs obtained from alternative iPSC cell lines – DMB02 (E) and DMB04 (F) line in control conditions and after silmitasertib stimulation; Two-way ANOVA vs control. G - Transduction efficiency calculated as percentage of GFP<sup>+</sup> cells (G) and median fluorescence intensity (H) in iPSC-CMs obtained from DBM2 line using scAAV6 and scAAV9 in control conditions and after silmitasertib treatment; I – Transduction efficiency of ssAAV vectors in iPSC-CFs after silmitasertib treatment. J – efficiency of CAV1 silencing in iPSC-CFs 48h after transfection with siRNA, K – MFI in iPSC-CFs transduced with scAAV2 or scAAV9 after silencing of CAV1; L – MFI in iPSC-CMs transduced with scAAV9 after silencing of CAV1; M – MFI in HAECs transduced with scAAV9 after silencing of CAV1; Student's t-test vs siMOCK, \* p<0.05, \*\* p< 0.01; N – Flow cytometry analysis of scAAV9 transduction efficiency in the presence of silmitasertib in iPSC-CFs following siATG7 transfection. Percentage of GFP<sup>+</sup> cells was assessed by flow cytometry 5 days after exposure to the vectors. Two-way ANOVA vs control \* p<0.05, \*\* p<0.01, \*\*\* p<0.001, \*\*\*\* p<0.0001

Fig. S3

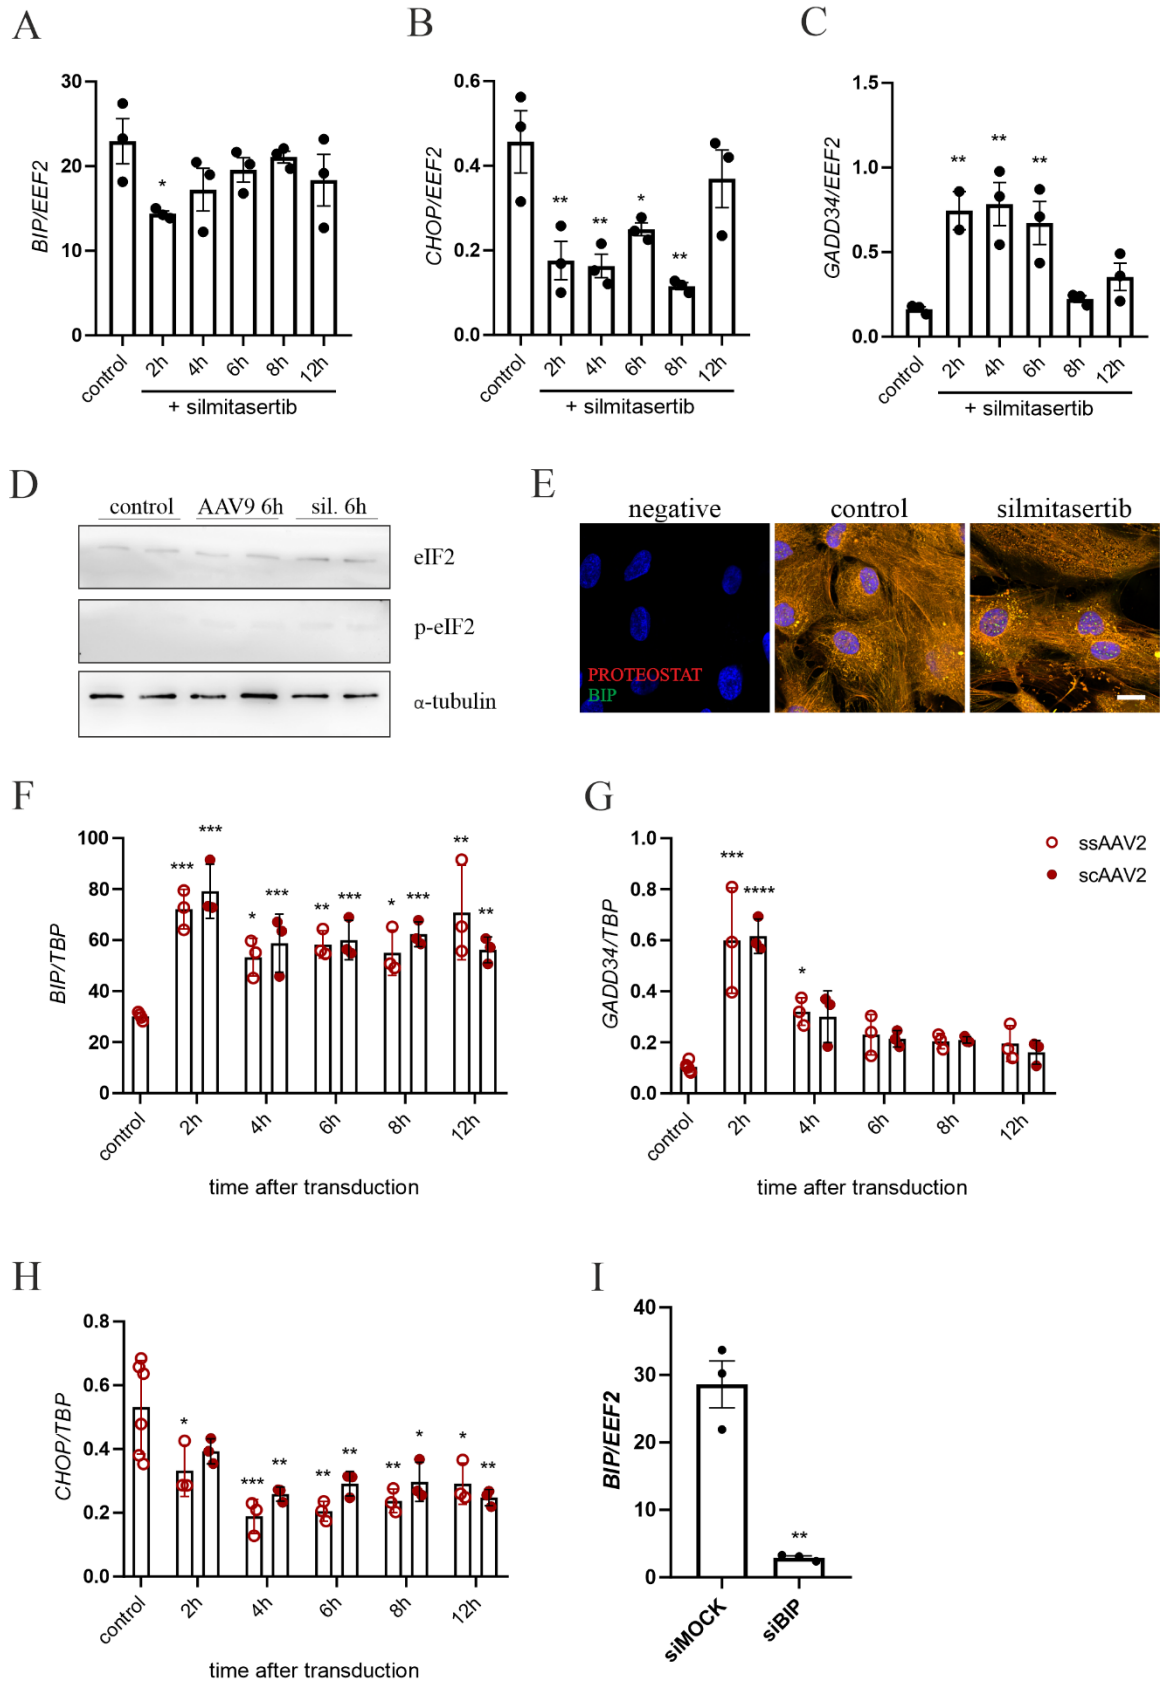

**Fig. S3 Unfolded protein response upon silmitasertib treatment and AAV transduction.**

Expression of *BIP* (A), *CHOP* (B), *GADD34* (C) in iPSC-CFs after silmitasertib stimulation; One-way ANOVA \*  $p < 0.05$ , \*\*  $p < 0.01$ ; D – western blot for eIF2 $\alpha$  and phosphorylated eIF2 $\alpha$  in iPSC-CFs, 6h after transduction with AAV vectors or treatment with silmitasertib; E – immunofluorescent staining for BIP and protein aggregates (PROTEOSTAT) in iPSC-CFs treated with silmitasertib for 6h, scale bar = 10 $\mu$ m; Expression of *BIP* (F), *GADD34* (G) and *CHOP* (H) in iPSC CFs transduced with ssAAV2 or scAAV2. One-way ANOVA \*  $p < 0.05$ , \*\*  $p < 0.01$ , \*\*\*  $p < 0.001$ , \*\*\*\*  $p < 0.0001$  vs control conditions; I – efficiency of BIP silencing in iPSC-CFs 48h after transfection with siRNA, Student's t-test vs siMOCK, \*  $p < 0.05$ , \*\*  $p < 0.01$

Fig. S4

A

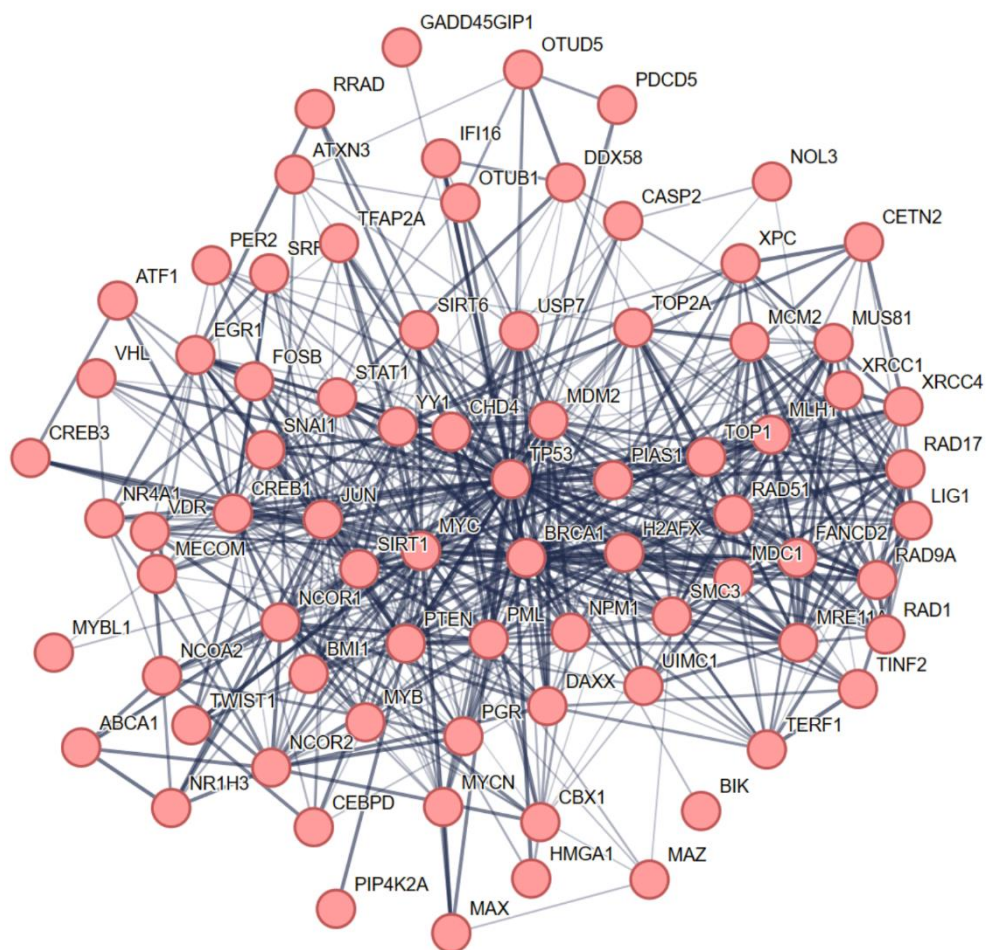

B

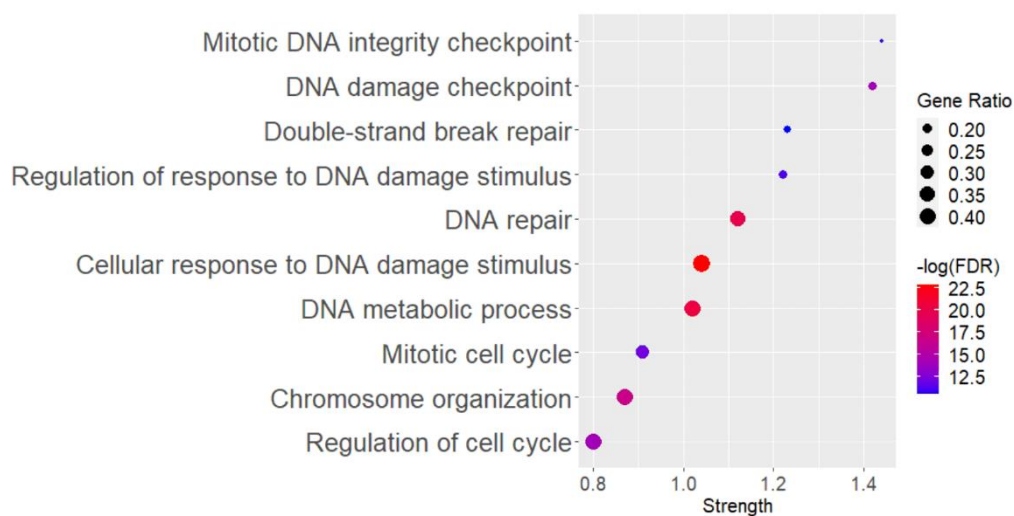

Fig. S4 **CK2 interactome analysis**. A – Graphical representation of DNA repair-associated cluster identified in total CK2 interactome analysis based on STRING protein-protein interaction network; B – analysis of GO-term pathway enrichment in the DDR cluster based on STRING analysis;

Fig. S5

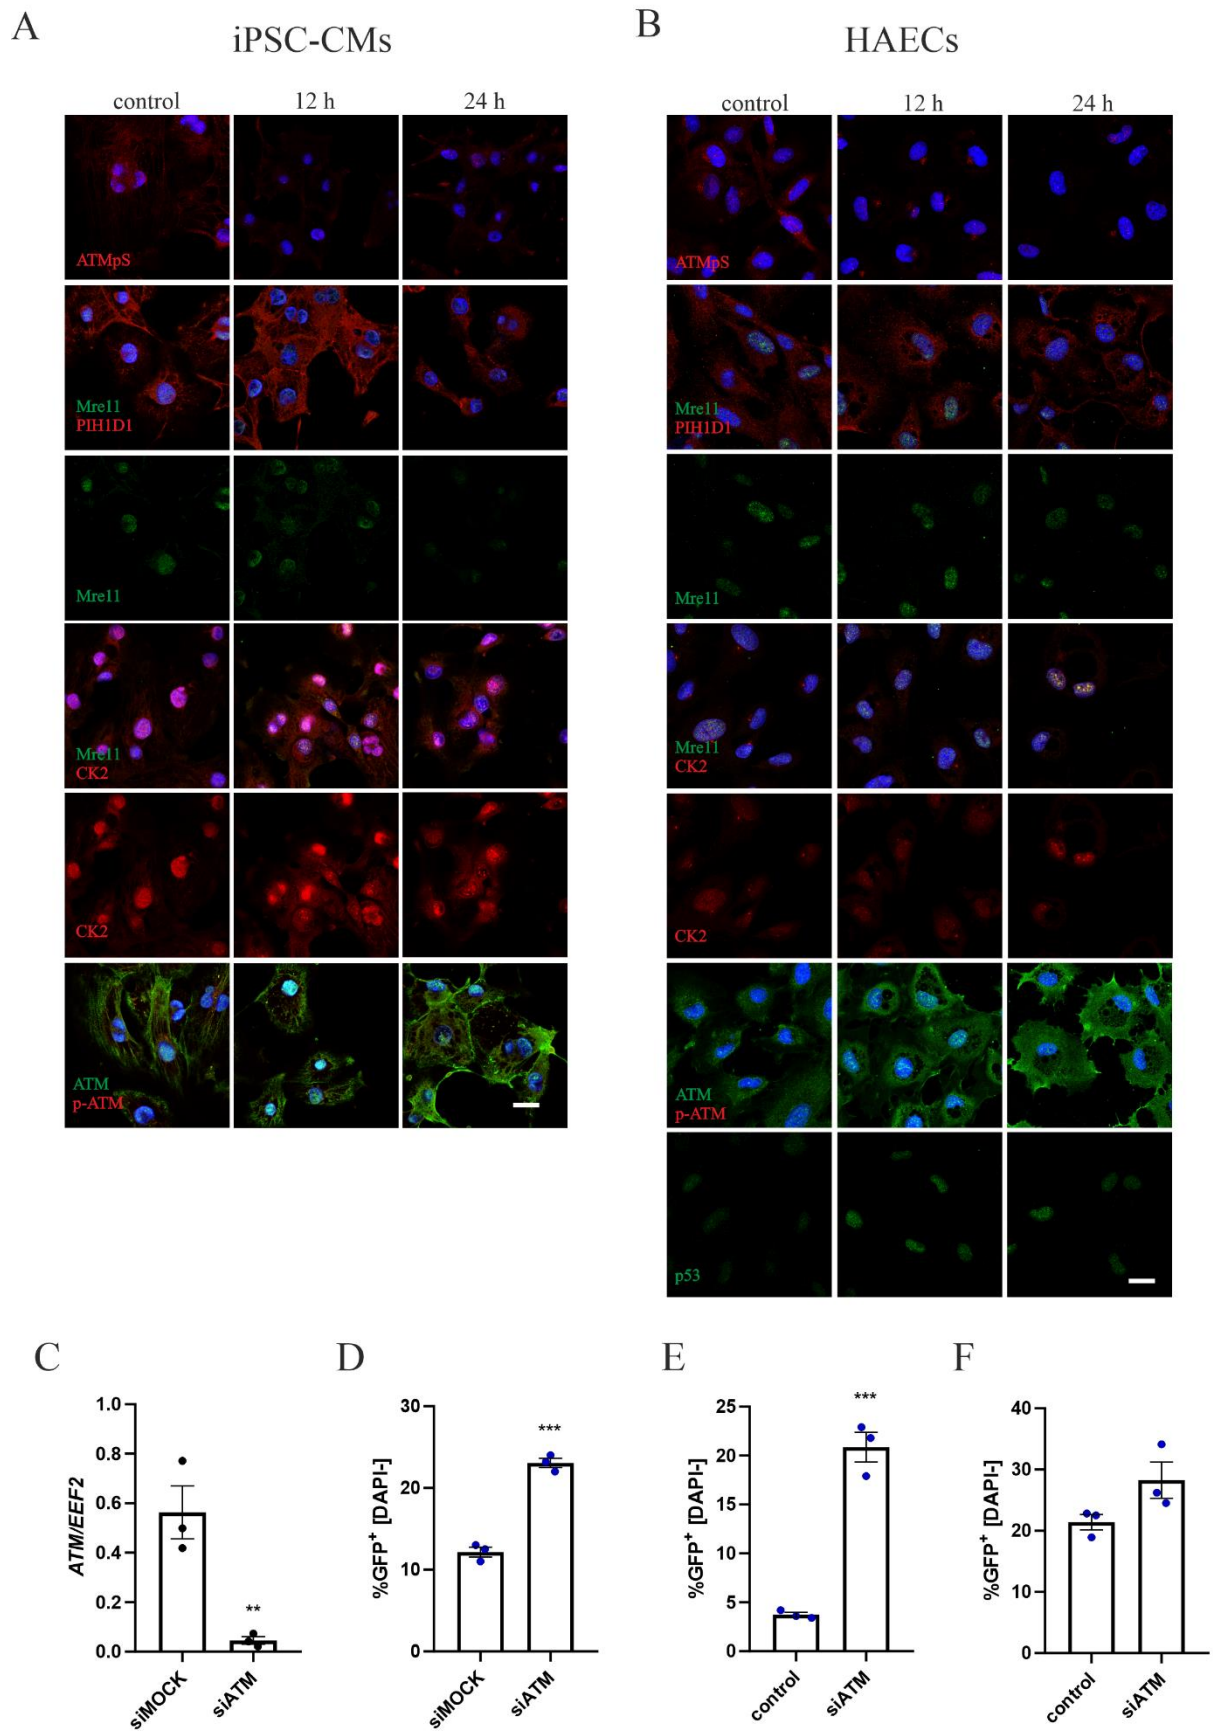

**Fig. S5 The impact of CK2 activity inhibition on DNA damage response machinery.** Immunofluorescent staining of iPSC-CMs (A) and HAECs (B) for Mre11, PIH1D1, CK2, ATM/ATR phosphorylated substrate (abbreviated as ATMpS in the figure), ATM, p-ATM and p53 at 12 and 24 h after silmitasertib treatment; Scale bar = 10  $\mu$ m; C – efficiency of ATM silencing in iPSC-CFs 48h after transfection with siRNA, Student's t-test vs siMOCK, \*  $p < 0.05$ , \*\*  $p < 0.01$ ; Flow cytometry analysis of AAV2 transduction efficiency in iPSC-CFs (D) and AAV9 in HAECs (E) and iPSC-CMs (F) following siATM transfection. Transduction efficiency was assessed 5 days after exposure to AAV vectors; Student's t-test vs appropriate control \*  $p < 0.05$ , \*\*  $p < 0.01$ , \*\*\*  $p < 0.001$ ;



Fig. S6

A

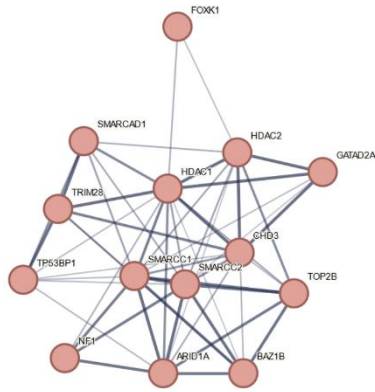

B

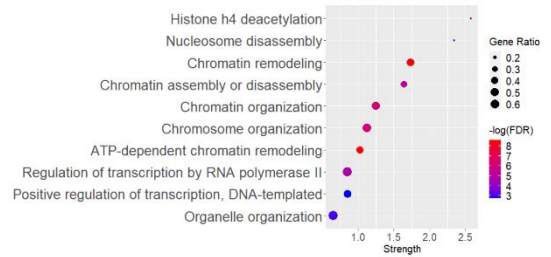

C

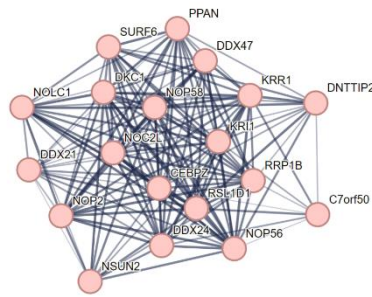

D

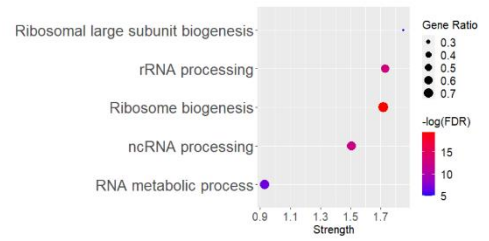

E

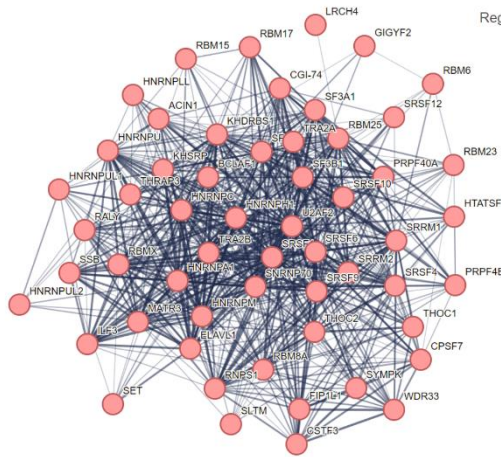

F

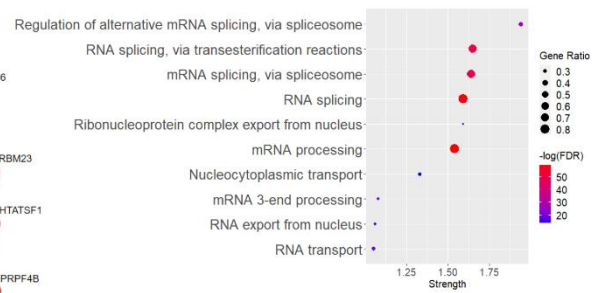

**Fig. S6 Impact of silmitasertib on DNA-damage and RNA processing-related signalling.**

A – The STRING protein-protein interaction network representing DNA repair-associated cluster, B – analysis of GO-term pathway enrichment in the cluster based on STRING analysis; C – The STRING protein-protein interaction network representing rRNA processing cluster, D – analysis of GO-term pathway enrichment in the cluster based on STRING analysis; E – The STRING protein-protein interaction network representing mRNA processing cluster, F – analysis of GO-term pathway enrichment in the cluster based on STRING analysis;

Fig. S7

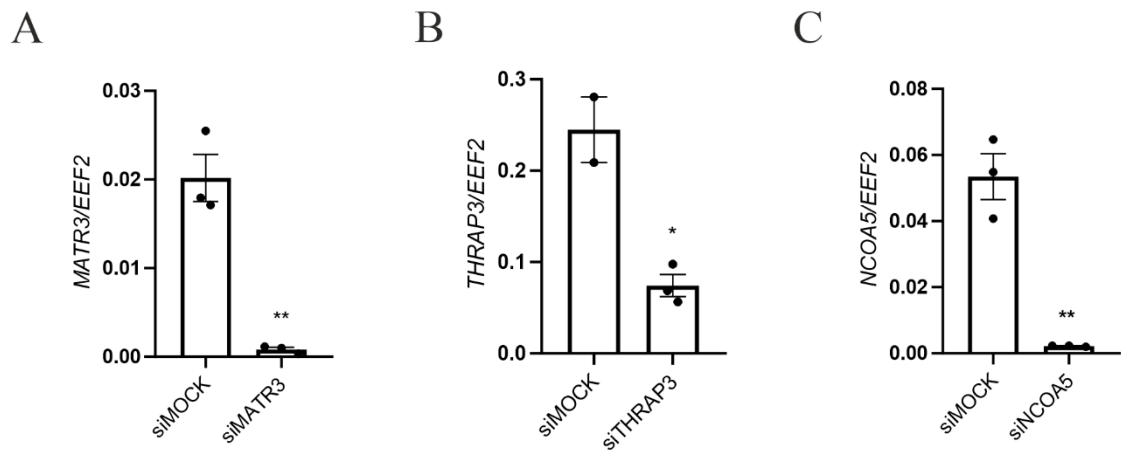

Fig. S7 **Knock-down efficiency in iPSC-CFs.** Efficiency of MATR3 (A), THRAP3 (B) and NCOA5 (C) silencing in iPSC-CFs 48h after transfection with siRNA, Student's t-test vs siMOCK, \* p<0.05, \*\* p< 0.01;

Fig. S8

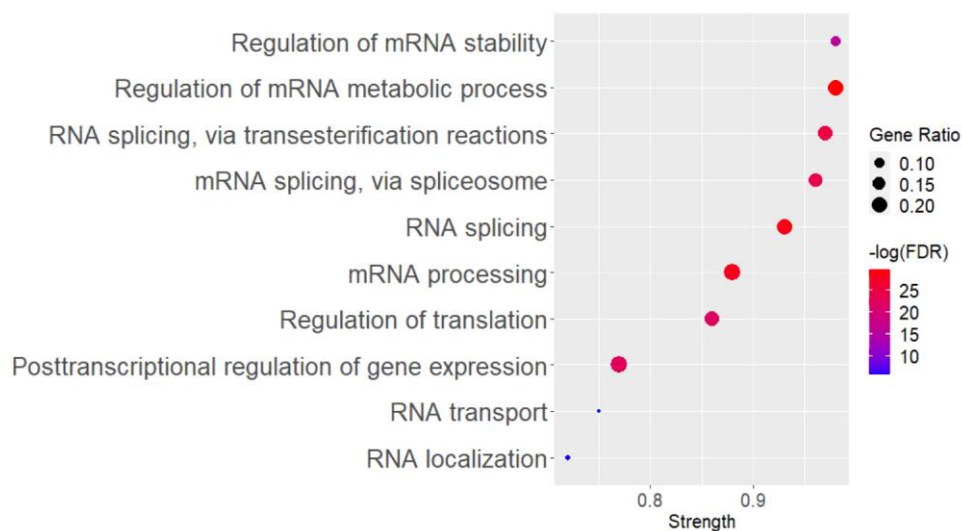

Fig. S8 **AAV interactome analysis from study by Chandran et al.,** Analysis of GO-term pathway enrichment based on STRING analysis
